# Supplementary material for: Monaural Beamforming in Bimodal Cochlear Implant Users: Effect of (A)symmetric Directivity and Noise Type
Source: PLoS One. 2016 Aug 18;11(8):e0160829. doi: 10.1371/journal.pone.0160829 (PMC4990192; doi:10.1371/journal.pone.0160829)
Supplement: S1 Table — Mean of two outcomes except 1 based on single outcome when other outcome a outside range of presented SNR's or b larger than 15dB SNR. (XLSX) [file pone.0160829.s001.xlsx]

## Sheet: S1 Table
	Stationary			Fluctuating
Subject	Omni	Asymm	Symm	Omni	Asymm	Symm
BZ01	-6.2	-7.8	-9.91a	2.7	-0.5	-0.9
BZ02	-3.0	-4.3	-7.01a	5.1	2.3	1.8
BZ03	0.4	0.3	-0.3	10.8	9.6	8.2
BZ04	-2.3	-3.1	-5.9	4.8	4.0	1.8
BZ05	-0.8	-1.4	-3.5	7.4	3.6	4.1
BZ06	-0.61a	-4.8	-3.9	5.5	5.7	4.4
BZ07	3.5	5.8	3.7	13.41b	9.0	8.6
BZ08	0.5	-2.6	-3.2	4.0	3.4	2.4
BZ09	-0.4	-0.7	-1.6	4.4	3.2	3.71a
BZ10	-2.6	-4.91a	-6.6	6.7	4.0	2.4
BZ11	1.3	2.2	0.9	7.7	5.3	7.3
BZ12	-0.2	-2.5	-5.5	5.0	3.7	2.8
MEAN	-0.86	-1.97	-3.55	6.45	4.42	3.86
SD	2.43	3.59	3.78	3.04	2.74	2.85
